# Supplementary material for: Epstein-Barr virus encoded miR-BART11 promotes inflammation-induced carcinogenesis by targeting FOXP1
Source: PubMed Central journal article supplement (PMC5095039; doi:10.18632/oncotarget.9170), 2016-05-04
Supplement: oncotarget-07-36783-s001.pdf [file oncotarget-07-36783-s001.pdf]

SUPPLEMENTARY FIGURE AND TABLE

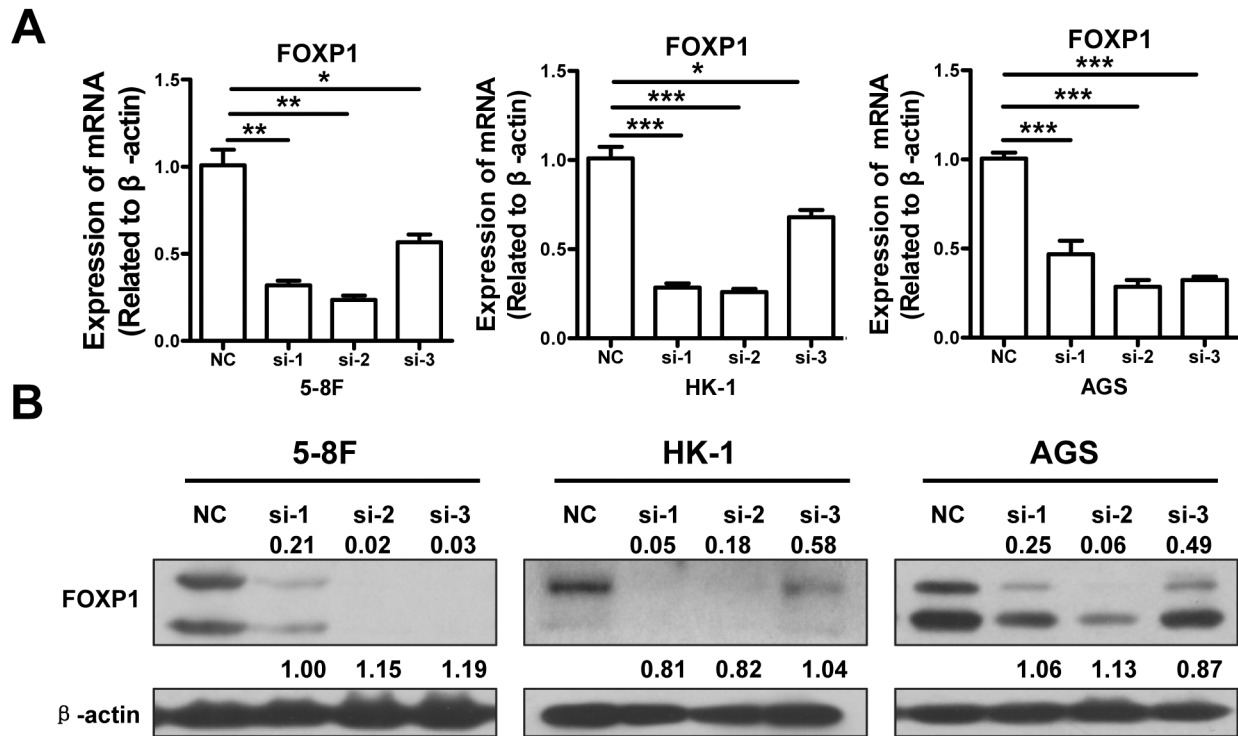

**Supplementary Figure S1: The effects of siFOXP1 on the expression of FOXP1.** **A.** The expression of FOXP1 in 5-8F, HK-1, and AGS cells transfected with three siRNAs that specifically targeted FOXP1 (siFOXP1). **B.** The expression of FOXP1 protein following the siFOXP1 transfection. The results are representative images or expressed as mean  $\pm$  SD obtained using different cell lines in three independent experiments. (\* $p < 0.05$ ; \*\* $p < 0.01$ ; \*\*\* $p < 0.001$ ).

Supplementary Table S1: Primers used for qRT-PCR or construction and siRNA.

See Supplementary File 1
